# Supplementary material
Source: HighWire-hosted journal article supplement (http://bmjopenquality.bmj.com/highwire/filestream/135938/field_highwire_adjunct_files/0/ds4069.docx)

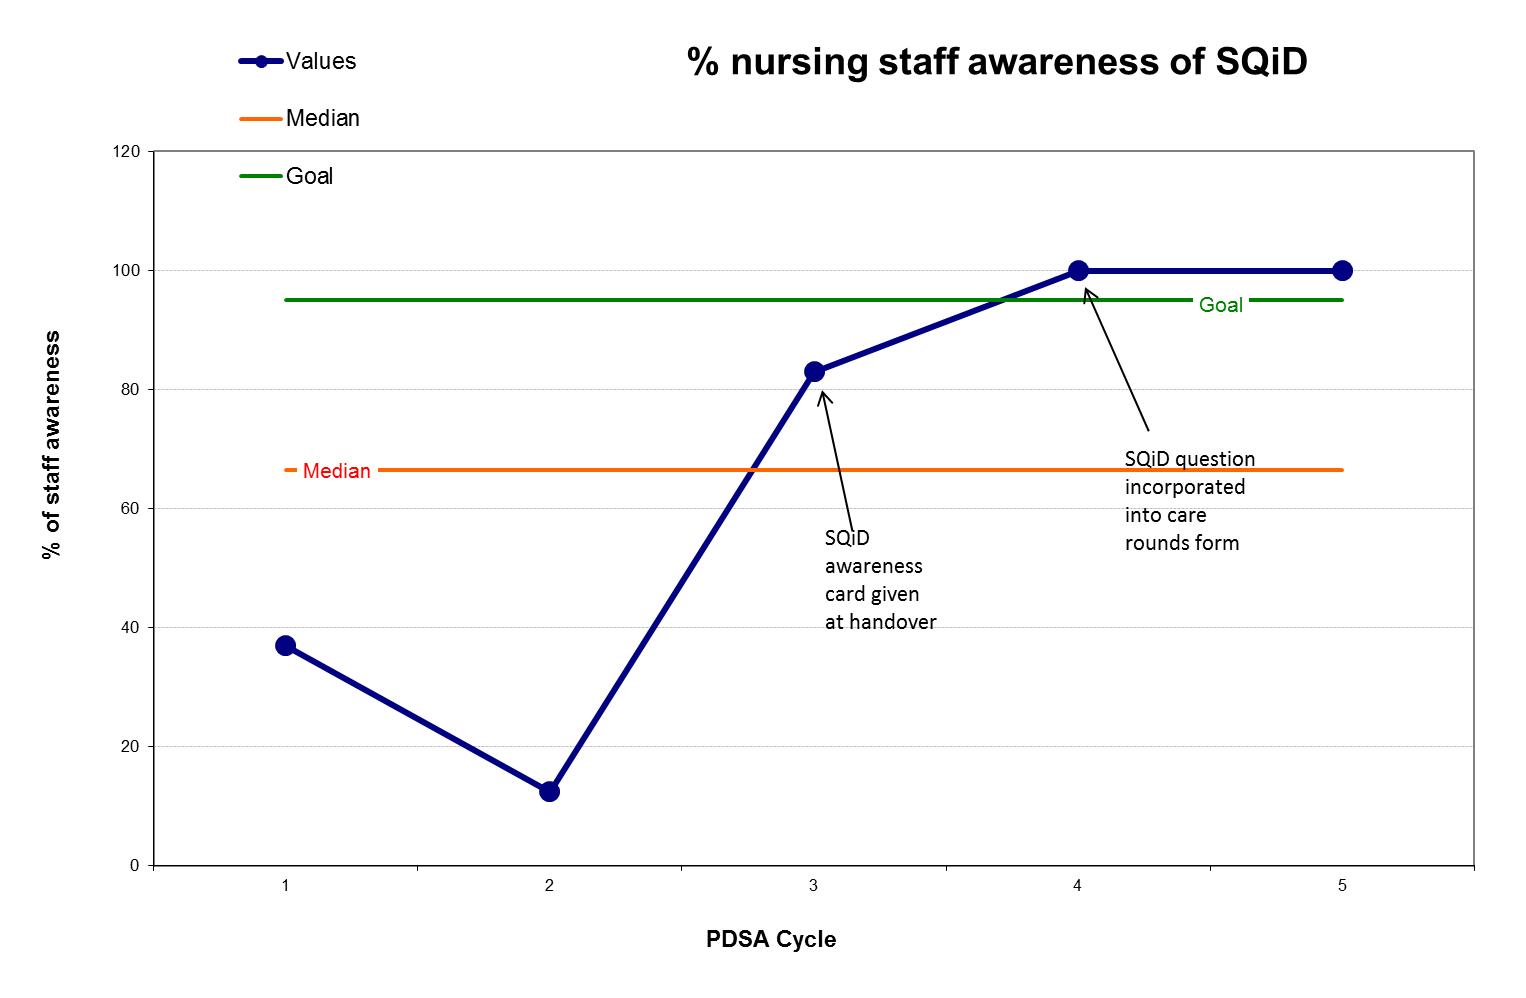


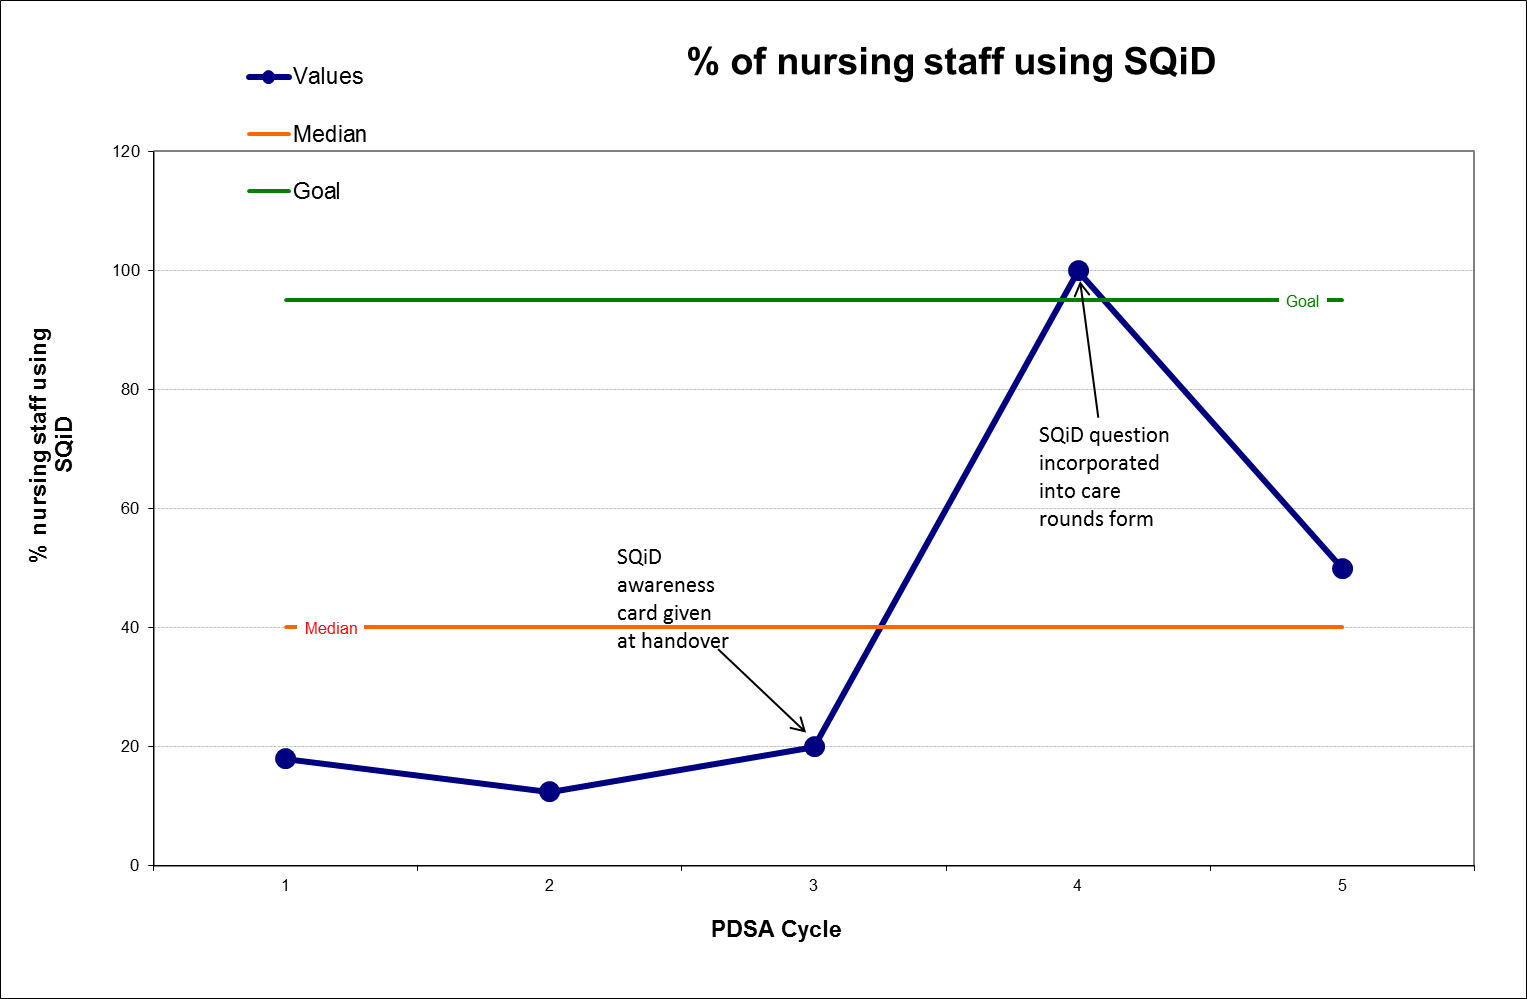

Supplement: ds4069.docx [file ds4069.docx]
